# Supplementary material for: Water disinfection using Ag nanoparticle–CuO nanowire co-modified 3D copper foam nanocomposites in high flow under low voltages
Source: Royal Society of Chemistry journal article supplement (doi:10.1039/c9en00455f), 2019-01-01
Supplement: c9en00455f1.pdf [file c9en00455f1.pdf]

# Water Disinfection by Ag nanoparticle–CuO nanowire Co-modified 3D Copper Foam Nanocomposites in High Flow under Low Voltages

Longfei Yue,<sup>1,2</sup> Shougang Chen,<sup>1,\*</sup> Shuting Wang,<sup>1</sup> Caiyu Wang,<sup>1</sup> Xiangping Hao,<sup>1,2</sup> Y. Frank  
Cheng<sup>2,\*</sup>

<sup>1</sup> *School of Materials Science and Engineering, Ocean University of China, Qingdao 266100,  
China.*

<sup>2</sup> *Department of Mechanical Engineering, University of Calgary, Calgary, Alberta, T2N 1N4,  
Canada*

---

\* Corresponding authors.

[sgchen@ouc.edu.cn](mailto:sgchen@ouc.edu.cn); [fcheng@ucalgary.ca](mailto:fcheng@ucalgary.ca)

## S1. Photos of electroporation disinfection mould

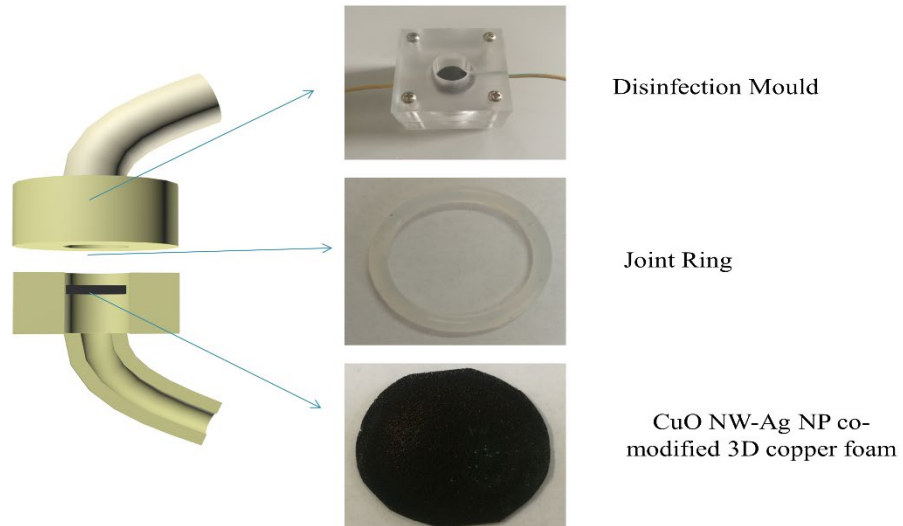

Fig. S1. Photos of electroporation disinfection mould. Left is the mould profile and the component is on the right. Bacteria solution flow in the top tube, penetrate through the specimen, then flow out and be collected.

S2.

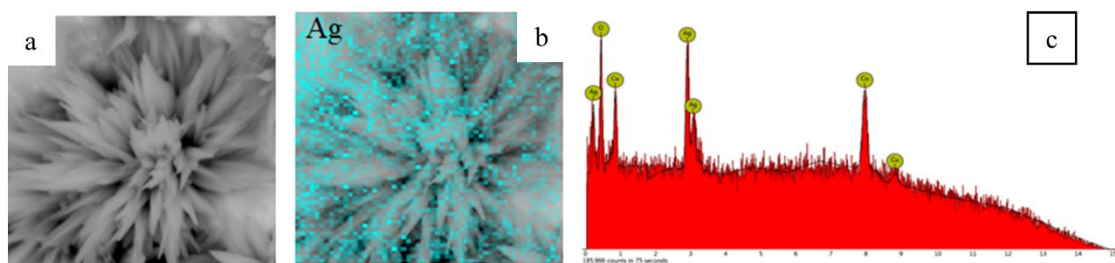

Fig. S2. EDS images of Ag NPs-CuO NWs. (a) shows the flower cluster structure of the CuO nanowires. (b) EDS elemental mapping of the same region, indicates that Ag uniformly distributed on the nanowire. (c) shows the all elemental composition and the detail is in Table S1.

Table S1. Elemental composition of various samples analyzed by EDS

| Element Symbol | Element Name | Atomic Conc. | Weight Conc. |
|----------------|--------------|--------------|--------------|
| O              | Oxygen       | 58.74        | 23.42        |
| Cu             | Copper       | 31.07        | 49.20        |
| Ag             | Silver       | 10.19        | 27.38        |

### S3. Ag ion and Cu ion concentration in the flow test

After sterilization process, analyze the ion concentration of silver and copper in the bacteria solution. All samples were treated by adding nitric acid to 5%. The samples were filtered with 0.2  $\mu\text{m}$  pore size filters before measurement and test the results three times. The detail is in the Table S2.

Table S2. Ion concentration of  $\text{Ag}^+$ ,  $\text{Cu}^{2+}$  in the solution after sterilization process

| Ion species | $\text{Ag}^+$      |     |     | $\text{Cu}^{2+}$ |      |      |
|-------------|--------------------|-----|-----|------------------|------|------|
|             | Concentration(ppb) | 2.8 | 4.4 | 8.9              | 21.4 | 12.9 |
